# Supplementary material
Source: publisher figshare collection journal article supplement (https://karger.figshare.com/ndownloader/files/27958569)
Supplement: Supplementary file 1 [file 27958569]

**Supplementary Material - Additional File 2**

Data Extraction Table

|  |  |  | **Number** (for randomisation) | **Identifier** |
| --- | --- | --- | --- | --- |
|  |  |  | **DOI** |
|  |  |  | **Author** |
|  |  |  | **Year** |
|  |  |  | **Title of study** |
|  |  |  | **Name of measure** |
|  |  |  | **% of missing items** | **Interpretability** |
|  |  |  | **% of missing total scores** |
|  |  |  | **Floor/ ceiling effects: % min score; % max score** |
|  |  |  | **Apathy scores & change scores for relevant (sub)groups (e.g. cognitive impairment vs healthy controls) *Mean (SD), range or similar*** |
|  |  |  | **minimal important change or minimal important difference** |
|  |  |  | **Information on response shift** |
|  |  |  | **Design** | **Study characteristics** |
|  |  |  | **Sampling method** |
|  |  |  | **Setting (location, time, context)** |
|  |  |  | **Target population** |
|  |  |  | **eligibility criteria** |
|  |  |  | **N** (in each sub-analysis where appropriate) |
|  |  |  | **Measurement properties assessed** (i.e. relevant COSMIN boxes to complete) |
|  |  |  | **Further description of measure if needed (e.g. changes to original)** |
|  |  |  | **Country from which research was conducted** |
|  |  |  | **Language of measure** |
|  |  |  | **Age**  *Mean (SD), Range or similar* | **Participant Descriptives** |
|  |  |  | **Ethnicity** |
|  |  |  | **Distribution of sex**  *% M/ F* |
|  |  |  | **Disease characteristics** (disease status, severity, duration) |
|  |  |  | **Cognitive status**  *Mean (SD), range of MMSE or similar* |
|  |  |  | **Residential status**  *Type and distribution e.g. % at home in community* |
|  |  |  | **Content validity** *Describe method describe method briefly, e.g. asking stakeholders (e.g. patients, carers, experts) about the relevance, comprehensiveness, comprehensibility of the measure* | **Content validity** |
|  |  |  | **Structural validity -** (e.g. Comparative Fit Index or Tucker Lewis Index) | **Psychometric properties** |
|  |  |  | **Internal consistency** (e.g. Cronbach’s alpha) |
|  |  |  | **Reliability** (e.g. intra-class correlation co-efficient or weighted Kappa) |
|  |  |  | **Measurement error** (Standard error of measurement, Smallest Detectable change, Limits of Agreement, or % agreement) |
|  |  |  | **Hypothesis testing / Construct validity : comparisons**  Describe all comparator instruments used |
|  |  |  | **Hypothesis testing / Construct validity** (convergent and discriminative; cross-sectional data only) Describe statistical method, result for each relevant comparator measure) |
|  |  |  | **Cross cultural validity/ measurement invariance.** Differences between group factors |
|  |  |  | **Responsiveness**  (Longitudinal data only. Compared to another measure, compared across groups, or before & after intervention) |
